# Supplementary material for: A Novel Approach for Glioblastoma Treatment by Combining Apoptosis Inducers (TMZ, MTX, and Cytarabine) with E.V.A. (Eltanexor, Venetoclax, and A1210477) Inhibiting XPO1, Bcl-2, and Mcl-1
Source: MDPI journal article supplement (doi:10.3390/cells13070632), 2024-04-04
Supplement: s1 [file s1]

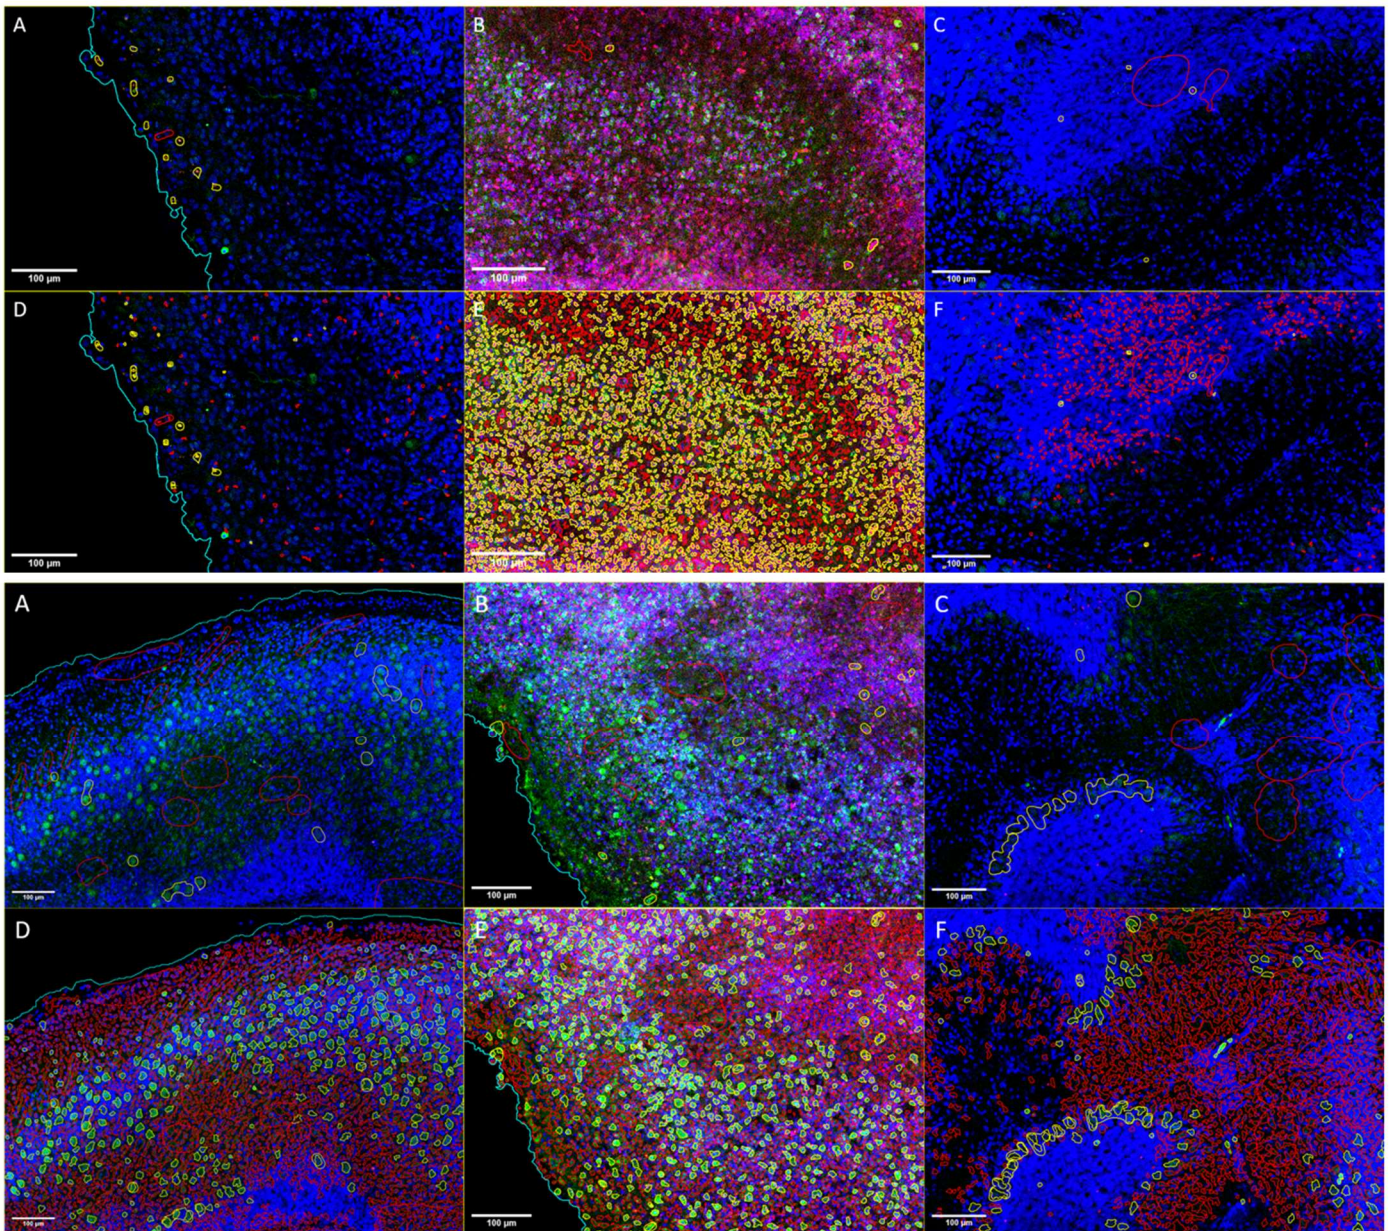

**Figure S1.** Training of Classifiers for PI (top panel) and Caspase 3 (bottom panel) exemplified by images from the groups „Control“ (DMSO, left), „Staurosporin“ (middle), and „TMZ“ (right). In figures A – C, only the annotations to train the classifiers are shown, whereas in figures D – F the detections obtained in the first step of image analysis are additionally shown. Channels: blue: Hoechst, red: propidium iodide, green: caspase 3; Annotations (A-F): cyan border: edge of the cerebellar slice, yellow border surrounding detections visually classified to be propidium iodide positive nuclei / Caspase 3 positive cells, red border surrounding detections visually classified to be ignored; Detections (D – F): yellow detections: detections classified as propidium positive nuclei / Caspase 3 positive cells by the object classifier, red detections: detections classified by the object classifier to be ignored.

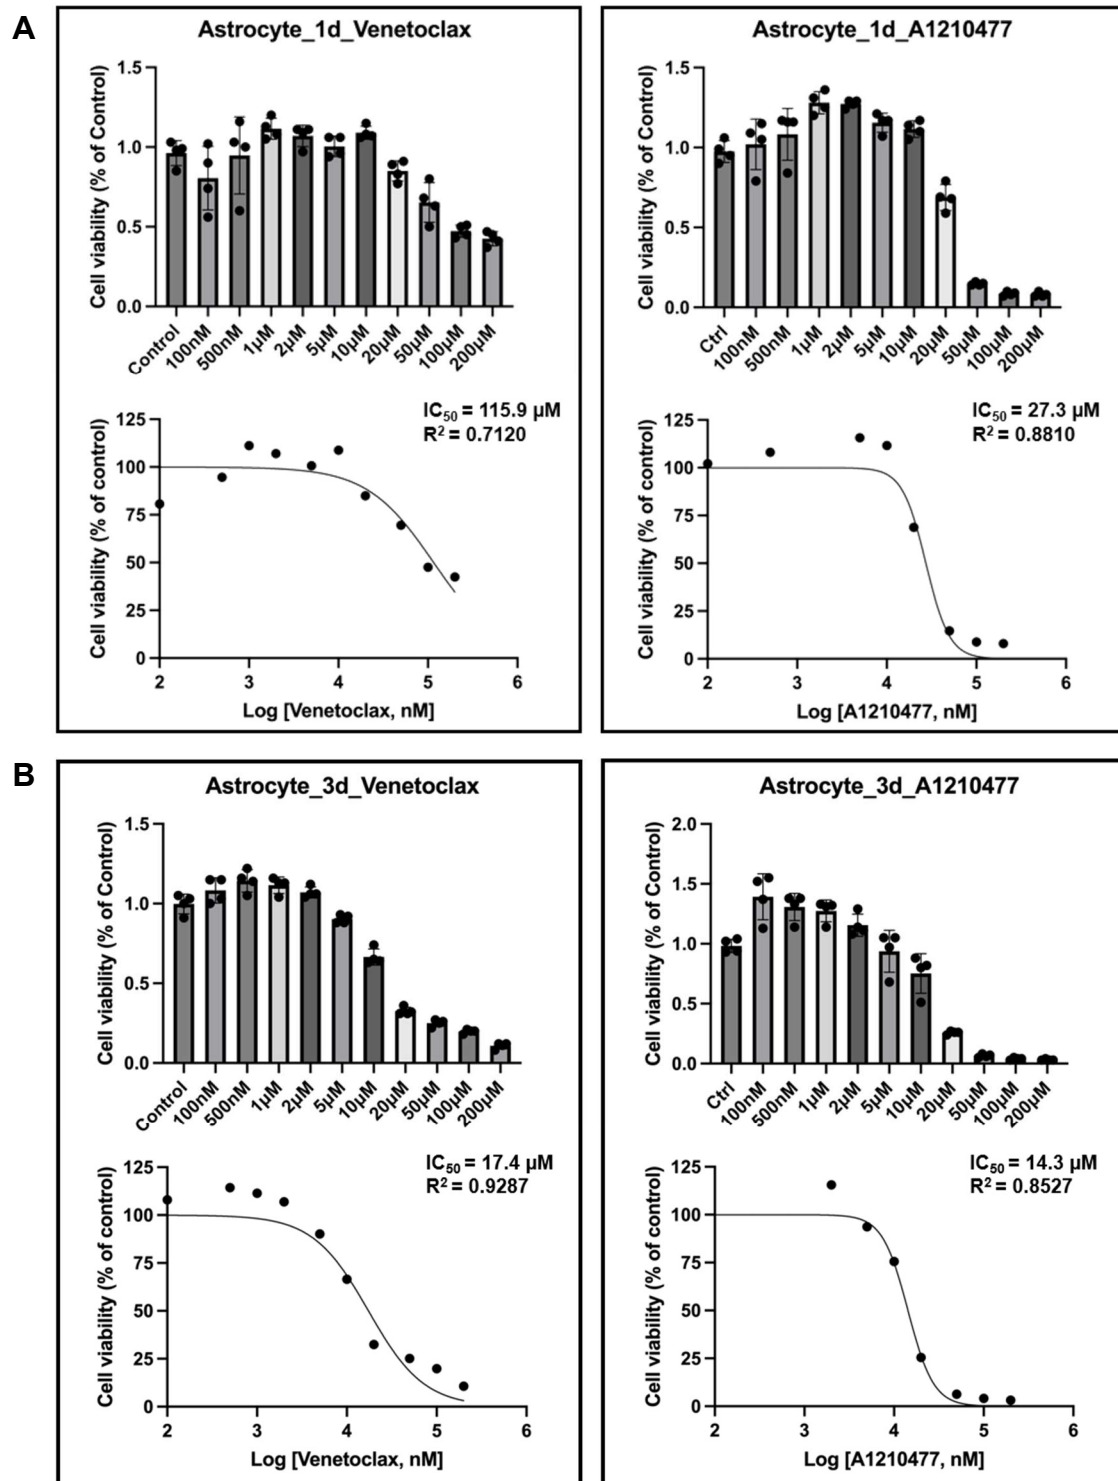

**Figure S2.** Cell viability curves for Venetoclax and A1210477 tested in primary astrocytes after 1 (A) and 3 days (B), respectively.  $IC_{50}$  values for both drugs were determined and depicted with their corresponding  $R^2$ -values. All data are from experiments performed in quadruplicates; data are presented as mean  $\pm$  SD.

**Table S1.** IC<sub>50</sub> values for Venetoclax and A1210477 for GB cell lines U87 and U251. All concentrations were determined by triplicates. Number of viable cells were determined by CellTiter-Glo reagent and IC<sub>50</sub> values were calculated using non-linear regression with the least-square fit.

| Cells       | IC <sub>50</sub> (nM)   |                        |                        |                       |
|-------------|-------------------------|------------------------|------------------------|-----------------------|
|             | 1d                      |                        | 3d                     |                       |
|             | Venetoclax              | A1210477               | Venetoclax             | A1210477              |
| <b>U87</b>  | 32.6 x 10 <sup>3</sup>  | 15.2 x 10 <sup>3</sup> | 7.7 x 10 <sup>3</sup>  | 7.8 x 10 <sup>3</sup> |
| <b>U251</b> | 129.8 x 10 <sup>3</sup> | 19.5 x 10 <sup>3</sup> | 18.6 x 10 <sup>3</sup> | 8.9 x 10 <sup>3</sup> |
